# Supplementary material
Source: PubMed Central journal article supplement (PMC3507471)
Supplement: NIHMS413145-supplement-1.pdf [file NIHMS413145-supplement-1.pdf]

## **SUPPLEMENTAL MATERIAL**

**Table 1.** Summary of CPAP studies conducted in stroke settings

| Author                                        | Duration       | Received CPAP (N)            | Outcome Variables                                                                | Significance                                                                                                                                                                                                                                                                                                                                                                                                                                                                                                                                            |
|-----------------------------------------------|----------------|------------------------------|----------------------------------------------------------------------------------|---------------------------------------------------------------------------------------------------------------------------------------------------------------------------------------------------------------------------------------------------------------------------------------------------------------------------------------------------------------------------------------------------------------------------------------------------------------------------------------------------------------------------------------------------------|
| <b>Observational Studies</b>                  |                |                              |                                                                                  |                                                                                                                                                                                                                                                                                                                                                                                                                                                                                                                                                         |
| Bassetti et al., (2006) <sup>1</sup>          | 60+/-16 months | 70                           | Treatment adherence                                                              | Eight patients (11%) were CPAP adherent at follow-up. Of those patient discharged from the hospital using CPAP, (31%) were adherent at follow                                                                                                                                                                                                                                                                                                                                                                                                           |
| Broadley et al. (2007) <sup>2</sup>           | NA             | 16                           | Treatment adherence                                                              | CPAP was “accepted” by 13 (81%) patients and “well tolerated” in eight (50%)                                                                                                                                                                                                                                                                                                                                                                                                                                                                            |
| Disler et al., (2002) <sup>3</sup>            | NA             | 5                            | Oxygen saturation<br>Treatment acceptance                                        | CPAP resulted in “normalization of oxygen saturation” in all patients<br>Treatment was “tolerated well”.                                                                                                                                                                                                                                                                                                                                                                                                                                                |
| Martinez-Garcia, et al., (2005) <sup>4</sup>  | 18 months      | 15 vs 36 (CPAP non-adherent) | New vascular events                                                              | CPAP adherence associated with fewer new vascular events (6.7% vs 36. $p = 0.03$ ).                                                                                                                                                                                                                                                                                                                                                                                                                                                                     |
| Martinez-Garcia et al (2009) <sup>5</sup>     | 5 years        | 28 vs 68 (CPAP non-adherent) | Mortality                                                                        | CPAP adherence was associated with decreased risk of mortality (49.6 % vs 68.3%; HR = 1.58; $p = 0.04$ ).                                                                                                                                                                                                                                                                                                                                                                                                                                               |
| Martinez-Garcia et al. (epub) <sup>6</sup>    | 7 years        | 28 vs 68 (CPAP non-adherent) | Non-fatal CVE                                                                    | CPAP adherence was associated with decreased risk of non-fatal CVE (17 vs 38.2%; HR = 2.87; $p = 0.03$ ).                                                                                                                                                                                                                                                                                                                                                                                                                                               |
| Palombini & Guilleminault (2006) <sup>7</sup> | 8 weeks        | 32                           | Treatment adherence                                                              | Seven patients (22%) were CPAP adherent at follow-up.                                                                                                                                                                                                                                                                                                                                                                                                                                                                                                   |
| Scala et al. (2009) <sup>8</sup>              | 1 night        | 12                           | Treatment adherence                                                              | Ten patients (84%) agreed to try CPAP; of those five (42%) used CPAP $\geq 6$ hours, five (42%) used CPAP for 1-3 hours.                                                                                                                                                                                                                                                                                                                                                                                                                                |
| Wessendorf et al. (2001) <sup>9</sup>         | 10 days        | 105                          | 24-h Blood Pressure (BP)<br><br>Subjective wellbeing<br><br>Treatment acceptance | 16 patients underwent 24-h BP monitoring. CPAP was associated with decreased nocturnal BP in CPAP compliant patients (N=11) compared to noncompliant patients (N=5) ( $\Delta -8$ vs $\Delta 0.8$ , $p = 0.04$ ). There was no difference in mean daytime BP between groups ( $\Delta -4.3$ vs $\Delta -6.8$ , $p = 0.57$ ).<br><br>Subjective wellbeing was assessed in 41 patients. CPAP use was associated with improvements compared to controls ( $\Delta 26$ vs $\Delta 2$ , $p = 0.02$ )<br><br>74/105 patients (70.5%) agreed to CPAP titration |

| Randomized Studies (CPAP group/Control Group (Treatment as Usual)) |           |       |                                                      |                                                                                                                                                                                             |
|--------------------------------------------------------------------|-----------|-------|------------------------------------------------------|---------------------------------------------------------------------------------------------------------------------------------------------------------------------------------------------|
| Bravata et al. (2010) <sup>10</sup>                                | 3 months  | 30/12 | Adherence to auto-CPAP                               | Regular CPAP use ( $\geq 70\%$ nights for $\geq 4$ hours/night) was observed in 12 patients (40%), 18 patients (60%) had "some use (< 70% nights for < 4 hours/night"                       |
|                                                                    |           |       | Recurrent vascular event rate                        | Vascular event rate was highest amongst sleep apnea patients with no CPAP use (16%), lower in those with "some use" (5%) and lowest in those with "acceptable adherence (0%) ( $p = 0.08$ ) |
| Bravata et al. (2011) <sup>11</sup>                                | 1 month   | 31/24 | National Institutes of Health Stroke Scale (NIHSS)   | CPAP use associated with greater improvements on the NIHSS ( $\Delta -3.0$ ) than control ( $\Delta -1.0$ ) ( $p = 0.03$ ).                                                                 |
| Hsu et al. (2006) <sup>12</sup>                                    | 8 weeks   | 15/15 | Extended Activities of Daily Living (EADL) Total     | CPAP use, compared to control, was not associated with improvements in the EADL total at 6-month follow-up (28 vs 23, $p = 0.50$ )                                                          |
|                                                                    |           |       | Barthel Index (BI)                                   | CPAP use, compared to control, was not associated with improvements in the BI at 6-month follow-up (18 vs 19, $p = 0.64$ )                                                                  |
|                                                                    |           |       | Short Form-36 Health Survey (SF-36) Physical Summary | CPAP use, compared to control, was not associated with improvements in the SF-36 Physical Summary at 6-month follow-up (28.4 vs 19.8, $p = 0.25$ )                                          |
|                                                                    |           |       | SF-36 Mental Summary                                 | CPAP use, compared to control, was not associated with improvements in the SF-36 Mental Summary at 6-month follow-up (54.3 vs 52.8, $p = 0.80$ )                                            |
| Hui et al., (2002) <sup>13</sup>                                   | NA        | 34/25 | Treatment acceptance/adherence                       | 16 patients (47%) agreed to a CPAP titration study, of which 4 (12%) agreed to continue using CPAP at home.                                                                                 |
| Parra et al. (2011) <sup>14</sup>                                  | 24 months | 71/69 | BI                                                   | CPAP use not associated with changes on the BI compared to control ( $\Delta 1.0$ vs $-\Delta 19.6$ , $p > 0.05$ )                                                                          |
|                                                                    |           |       | Canadian scale                                       | CPAP use not associated with changes in the Canadian scale compared to control ( $\Delta 1.0$ vs $\Delta 1.5$ , $p > 0.05$ )                                                                |
|                                                                    |           |       | Rankin Scale                                         | CPAP use not associated with changes in the Rankin scale compared to control ( $\Delta -0.5$ vs $\Delta -0.6$ , $p > 0.05$ )                                                                |
|                                                                    |           |       | SF-36                                                | CPAP use not associated with changes in the SF-36 compared to control ( $\Delta 7.5$ vs $\Delta 7.8$ , $p > 0.05$ )                                                                         |

|                                       |         |       |                                                  |                                                                                                                                                                                                                                                                                                                                                                                                                                      |
|---------------------------------------|---------|-------|--------------------------------------------------|--------------------------------------------------------------------------------------------------------------------------------------------------------------------------------------------------------------------------------------------------------------------------------------------------------------------------------------------------------------------------------------------------------------------------------------|
| Ryan et al. (2011) <sup>15</sup>      | 1 month | 22/22 | Cardiovascular events                            | CPAP associated with longer mean time until next cardiovascular event (versus 7.9 months, $p = 0.04$ )                                                                                                                                                                                                                                                                                                                               |
|                                       |         |       | Cardiovascular mortality                         | CPAP use not associated with differences in cardiovascular mortality compared to control (87.7% versus 88.4%, $p = 0.91$ )                                                                                                                                                                                                                                                                                                           |
|                                       |         |       | 6-minute walk test                               | CPAP use was not associated with improvements on the 6-minute walk test compared to controls ( $\Delta 113$ vs $\Delta 46$ , $p = 0.75$ )                                                                                                                                                                                                                                                                                            |
|                                       |         |       | Canadian Scale                                   | CPAP use was associated with improvements on the Canadian scale compared to controls ( $\Delta 2.3$ vs $\Delta 0.7$ , $p < 0.001$ )                                                                                                                                                                                                                                                                                                  |
|                                       |         |       | Chedoke-McMaster Stroke Assessment Scale (CMSAS) | CPAP use was marginally associated with improvements on the CMSAS total subscale ( $\Delta 1.1$ vs $\Delta 0.5$ , $p = 0.08$ ) and was associated with improvements on the leg subscale compared to controls ( $\Delta 0.8$ vs $\Delta 0.4$ , $p = 0.001$ ). CPAP use was not associated with improvements on the hand ( $\Delta 0.7$ vs $\Delta 0.7$ , $p = 0.92$ ) or foot subscales ( $\Delta 0.5$ vs $\Delta 0.7$ , $p = 0.64$ ) |
|                                       |         |       | Functional Independence Measure (FIM)            | CPAP use was marginally associated with improvements on the FIM compared to controls ( $\Delta 27.3$ vs $\Delta 20.0$ , $p = 0.07$ )                                                                                                                                                                                                                                                                                                 |
|                                       |         |       | Sustained Attention Response Time (SART)         | CPAP use was not associated with improvements on the SART, total number of false positive errors ( $\Delta 2$ vs $\Delta -1$ , $p = 0.26$ ) or mean RT in the 4 trials before false press ( $\Delta 12$ vs $\Delta -51$ , $p = 0.26$ ) compared to controls                                                                                                                                                                          |
|                                       |         |       | Digit + visual spatial                           | CPAP use was not associated with improvements on the Digit + visual spatial span-forward ( $\Delta 3$ vs $\Delta -3$ , $p = 0.27$ ) or span-backward ( $\Delta 10$ vs $\Delta 5$ , $p = 0.32$ ) compared to controls                                                                                                                                                                                                                 |
|                                       |         |       | Purdue Pegboard                                  | CPAP use was not associated with improvements on the Purdue Pegboard dominant hand score ( $\Delta 3$ vs $\Delta 6$ , $p = 0.88$ ), nondominant hand score ( $\Delta 4$ vs $\Delta 7$ , $p = 0.37$ ) or affected hand score ( $\Delta 4$ vs $\Delta 7$ , $p = 0.62$ ) compared to controls                                                                                                                                           |
|                                       |         |       | Beck Depression Inventory (BDI)                  | CPAP use was not associated with improvements on the somatic component of the BDI (values not reported). A significant reduction in the affective component was observed, compared to controls ( $\Delta -2.6$ vs $\Delta -1.4$ , $p = 0.001$ )                                                                                                                                                                                      |
| Sandberg et al., (2001) <sup>16</sup> | 1 month | 33/30 | Epworth Sleepiness Scale (ESS)                   | CPAP group showed improvements on the ESS compared to controls ( $\Delta -2.6$ , $p < 0.0001$ )                                                                                                                                                                                                                                                                                                                                      |
|                                       |         |       | Stanford Sleepiness Scale (SSS)                  | CPAP group showed improvements on the SSS compared to controls ( $\Delta -1.1$ vs $\Delta -0.9$ , $p = 0.05$ )                                                                                                                                                                                                                                                                                                                       |
|                                       |         |       | BI                                               | CPAP use not associated with changes in the BI compared to control ( $\Delta 1.1$ , $p = 0.98$ )                                                                                                                                                                                                                                                                                                                                     |
|                                       |         |       | Delirium (%)                                     | CPAP use not associated with changes in delirium compared to control ( $\Delta 1.1$ , $p = 0.98$ )                                                                                                                                                                                                                                                                                                                                   |

|                                                              |          |       |                                                   |                                                                                                                                                                |
|--------------------------------------------------------------|----------|-------|---------------------------------------------------|----------------------------------------------------------------------------------------------------------------------------------------------------------------|
|                                                              |          |       | Mini-Mental Status Exam (MMSE)                    | 15.4% vs $\Delta$ -19.0%, $p = 0.88$<br>CPAP use not associated with improvements on the MMSE compared to control ( $\Delta$ 2.6 vs $\Delta$ 2.8, $p = 0.77$ ) |
|                                                              |          |       | Montgomery-Asberg Depression Rating Scale (MADRS) | CPAP use associated with greater improvements on the MADRS than control ( $\Delta$ -5.4 vs $\Delta$ 1.8, $p < 0.01$ ).                                         |
| <b>Randomized Study (CPAP group/Control Group Sham CPAP)</b> |          |       |                                                   |                                                                                                                                                                |
| Brown et al. (epub) <sup>17</sup>                            | 3 months | 15/17 | BI                                                | CPAP use not associated with changes on the BI compared to control (95 vs 100, $p > 0.05$ )                                                                    |
|                                                              |          |       | ESS                                               | CPAP use not associated with improvements on the ESS compared to control (8 vs 7, $p > 0.05$ )                                                                 |
|                                                              |          |       | Fatigue Severity Score (FSS)                      | CPAP use not associated with changes on the FSS compared to control (3 vs 2.4, $p > 0.05$ )                                                                    |
|                                                              |          |       | Patient Health Questionnaire (PHQ-9)              | CPAP use not associated with changes on the PHQ-9 compared to control (2 vs 2, $p > 0.05$ )                                                                    |
|                                                              |          |       | NIHSS                                             | CPAP use not associated with changes on the NIHSS compared to control (2 vs 2, $p > 0.05$ )                                                                    |

Addenbrooke's Cognitive Examination; ADL = activities of daily living; BDI = Beck Depression Inventory; BI= Barthel Index; BP = blood pressure; CMSAS = Chedoke-McMaster Stroke Assessment Scale; CPAP = continuous positive airway pressure; CVE = cardiovascular events; EADL = Extended Activities of Daily Living; ESS = Epworth Sleepiness Scale; FIM = Functional Independence Measure; FSS = Fatigue Severity Score; MADRS = Montgomery-Asberg Depression Rating Scale; MMSE = Mini-Mental Status Exam; NA = Not available; NIHSS = National Institutes of Health Stroke Scale; PHQ-9 = Patient Health Questionnaire; SSS = Stanford Sleepiness Scale; SART = Sustained Attention Response Time; SF-36 = Short Form-36 quality of life questionnaire; TAU = Treatment as usual

**Table 2.** Recruitment and Retention in Observational Studies

| Author                                        | Study Duration | Potential Participants N | Assigned to Sleep Study | Diagnosed with OSA N * | Prescribed CPAP N | CPAP Adherent in Hospital N | CPAP Adherent at Last Follow-up Point N |
|-----------------------------------------------|----------------|--------------------------|-------------------------|------------------------|-------------------|-----------------------------|-----------------------------------------|
| Bassetti et al., (2006) <sup>1</sup>          | 60+/-16 months | NA                       | 152                     | 70                     | 70                | 48                          | 8                                       |
| Broadley et al. (2007) <sup>2</sup>           | 6 weeks        | 81                       | 57                      | 23                     | 16                | 8                           | NA                                      |
| Disler et al., (2002) <sup>3</sup>            | NA             | 38                       | 38                      | 19                     | 5                 | 5                           | 5                                       |
| Martinez-Garcia, et al., (2005) <sup>4</sup>  | 18 months      | 139                      | 95                      | 51                     | 51                | NA                          | 15                                      |
| Martinez-Garcia et al (2009) <sup>5</sup>     | 5 years        | 223                      | 166                     | 96                     | 96                | NA                          | 28                                      |
| Martinez-Garcia et al. (epub) <sup>6</sup>    | 7 years        |                          |                         |                        |                   |                             |                                         |
| Palombini & Guilleminault (2006) <sup>7</sup> | 2 months       | 50                       | 21                      | 14                     | 14                | 12                          | 7                                       |
| Scala et al. (2009) <sup>8</sup>              | 1 night        | NA                       | 12                      | 12                     | 12                | 5                           | NA                                      |
| Wessendorf et al. (2001) <sup>9</sup>         | 10 days        | NA                       | 105                     | NA                     | 105               | 74                          | NA                                      |

\* OSA criteria varied by study team from AHI  $\geq$  5/hour to AHI  $\geq$  to 30/hour. Our table reflects the individual study diagnosis criteria.

NA = Not available

**Table 3.** Recruitment and Retention in Randomized Studies

| Author                                           | Study Duration | Potential Participants N | Potential Participants w/o exclusionary criteria N | Refused to Participate | Assigned to Sleep Study | Diagnosed with OSA N * | Randomized to CPAP/Control | Available for Follow-up Assessment N | CPAP Adherent at Last Follow-up Point N |
|--------------------------------------------------|----------------|--------------------------|----------------------------------------------------|------------------------|-------------------------|------------------------|----------------------------|--------------------------------------|-----------------------------------------|
| <b>Randomized Studies, Control Group TAU</b>     |                |                          |                                                    |                        |                         |                        |                            |                                      |                                         |
| Bravata et al. (2010) <sup>10</sup>              | 3 months       | 360                      | 213                                                | 137                    | 70                      | 42                     | 30/12                      | NA                                   | 12 **                                   |
| Bravata et al. (2011) <sup>11</sup>              | 1 month        | 955                      | 199                                                | 144                    | 55                      | 28                     | 15/13                      | NA                                   | 10                                      |
| Hsu et al. (2006) <sup>12</sup>                  | 2 months       | 658                      | 96                                                 | 25                     | 71                      | 33                     | 15/15                      | 30                                   | 7                                       |
| Hui et al., (2002) <sup>13</sup>                 | NA             | 80                       | NA                                                 | NA                     | 51                      | 34                     | 34/25                      | NA                                   | 4                                       |
| Parra et al. (2011) <sup>14</sup>                | 24 months      | NA                       | NA                                                 | NA                     | 235                     | 140                    | 71/69                      | 126                                  | NA                                      |
| Ryan et al. (2011) <sup>15</sup>                 | 1 month        | 466                      | 194                                                | 91                     | 103                     | 48                     | 25/23                      | 44                                   | 22                                      |
| Sandberg et al., (2001) <sup>16</sup>            | 1 month        | 151                      | NA                                                 | NA                     | NA                      | 63                     | 31/28                      | 59                                   | 16 **                                   |
| <b>Randomized Study, Control Group Sham CPAP</b> |                |                          |                                                    |                        |                         |                        |                            |                                      |                                         |
| Brown et al. (epub) <sup>17</sup>                | 3 months       | 803                      | 264                                                | 133                    | 87                      | 54                     | 15/17                      | 19                                   | 8                                       |

\* OSA criteria varied by study team from AHI  $\geq$  5/hour to AHI  $\geq$  to 30/hour. Our table reflects the individual study diagnosis criteria.

\*\* Defined as CPAP use for longer than 4 hours/night

NA = Not available

## References

- (1) Bassetti CL, Milanova M, Gugger M. Sleep-disordered breathing and acute ischemic stroke: Diagnosis, risk factors, treatment, evolution, and long-term clinical outcomes. *Stroke*. 2006;37:967-972.
- (2) Broadley SA, Jorgensen L, Cheek A, Salonikis S, Taylor J, Thompson PD, et al. Early investigation and treatment of obstructive sleep apnoea after acute stroke. *J Clin Neurosci*. 2007;14:328-333.
- (3) Disler P, Hansford A, Skelton J, Wright P, Kerr J, O'Reilly J, et al. Diagnosis and treatment of obstructive sleep apnea in a stroke rehabilitation unit: a feasibility study. *Am J Physical Med Rehab*. 2002;81:622-625.
- (4) Martínez-García MÁ, Galiano-Blancart R, Román-Sánchez P, Soler-Cataluña JJ, Cabero-Salt L, Salcedo-Maiques E. Continuous positive airway pressure treatment in sleep apnea prevents new vascular events after ischemic stroke. *Chest*. 2005;128:2123-2129.
- (5) Martínez-García MÁ, Soler-Cataluña JJ, Ejarque-Martinez L, Soriano Y, Roman-Sanchez P, Illa FB, et al. Continuous positive airway pressure treatment reduces mortality in patients with ischemic stroke and obstructive sleep apnea: a 5-year follow-up study. *Am J Respir Crit Care Med*. 2009;180:36-41.
- (6) Martínez-García M, Campos-Rodríguez F, Soler-Cataluña J, Catalán-Serra P, Román-Sánchez P, Montserrat J. Increased incidence of non-fatal cardiovascular events in stroke patients with sleep apnoea. Effect of CPAP treatment: A 7-year follow-up study. *Eur Resp J*. 2011:epub.
- (7) Palombini L, Guilleminault C. Stroke and treatment with nasal CPAP. *Eur J Neurol*. 2006;13:198-200.



- 8) Scala R, Turkington PM, Wanklyn P, Bamford J, Elliott MW. Acceptance, effectiveness and safety of continuous positive airway pressure in acute stroke: a pilot study. *Respir Med.* 2009;103:59-66.
- (9) Wessendorf T, Wang Y, Thilmann A, Sorgenfrei U, Konietzko N, Teschler H. Treatment of obstructive sleep apnoea with nasal continuous positive airway pressure in stroke. *Eur Resp J.* 2001;18:623-629.
- (10) Bravata DM, Concato J, Fried T, Ranjbar N, Sadarangani T, McClain V, et al. Auto-titrating continuous positive airway pressure for patients with acute transient ischemic attack: A randomized feasibility trial. *Stroke.* 2010;41:1464-1470.
- (11) Bravata DM, Concato J, Fried T, Ranjbar N, Sadarangani T, McClain V, et al. Continuous positive airway pressure: evaluation of a novel therapy for patients with acute ischemic stroke. *Sleep.* 2011;34:1271-1277.
- (12) Hsu CY, Vennelle M, Li HY, Engleman HM, Dennis MS, Douglas NJ. Sleep-disordered breathing after stroke: a randomised controlled trial of continuous positive airway pressure. *J Neurol Neurosurg Ps.* 2006;77:1143-1149.
- (13) Hui DSC, Choy DKL, Wong LKS, Ko FWS, Li TST, Woo J, et al. Prevalence of sleep-disordered breathing and continuous positive airway pressure compliance: Results in Chinese patients with first-ever ischemic stroke. *Chest.* 2002;122:852-860.
- (14) Parra O, Sánchez-Armengol Á, Bonnin M, Arboix A, Campos-Rodríguez F, Pérez-Ronchel J, et al. Early treatment of obstructive apnoea and stroke outcome: a randomised controlled trial. *Eur Resp J.* 2011;37:1128-1136.

(15) Ryan CM, Bayley M, Green R, Murray BJ, Bradley TD. Influence of continuous positive airway pressure on outcomes of rehabilitation in stroke patients with obstructive sleep apnea. *Stroke*. 2011;42:1062-1067.

(16) Sandberg O, Franklin K, Bucht G, Eriksson S, Gustafson Y. Nasal continuous positive airway pressure in stroke patients with sleep apnoea: a randomized treatment study. *Eur Resp J*. 2001;18:630-634.

(17) Brown DL, Chervin RD, Kalbfleisch JD, Zupancic MJ, Migda EM, Svatikova, A et al. Sleep Apnea Treatment After Stroke (SATS) Trial: Is It Feasible? *J Stroke Cerebrovas*. 2011:epub.
